# Supplementary material for: Receptor Tyrosine Kinase Phosphorylation Pattern–Based Multidrug Combination Is an Effective Approach for Personalized Cancer Treatment
Source: Oxford University Press journal article supplement (doi:10.1158/1535-7163.mct-15-0735), 2016-07-25
Supplement: 15357163mct150735-sup-155137_4_supp_3558885_89f8jj.xlsx [file 15357163mct150735-sup-155137_4_supp_3558885_89f8jj.xlsx]

## Sheet: Tab S1
	Table S1. Sensitivities of the Cancer Cells to Single RTKi Treatment a
	Cell line	Addicted kinase (IC50 for the effective RTKi)	IC50 fold over kinase-addicted cells b
			LAP	OSI	JNJ	AXI
	BT474	HER2 (LAP, 43 nM)	1	ND	ND	318.182
	COLO205	IGF1R (OSI, 759 nM)	325.581	1	2724	69.0909
	EBC-1	MET (JNJ, 29 nM)	146.512	12.2368	1	90.9091
	K562	VEGFR3 (AXI, 115 nM)	255.814	13.1579	ND	1
	SW1116		302.326	8.68421	ND	ND
	HCT116		348.837	14.4737	ND	20
	WiDr		442	25	ND	ND
	LoVo		256	7	3138	5
	LS174T		1814	42	ND	136
	HT29		181	9	ND	65
	MDA-MB-453		105	16	ND	ND
	BEL7404		139.535	3.28947	ND	43.6364
	SMMC7721		348.837	11.4474	ND	318.182
	LM3		326	9	ND	85
	Hep3B		ND	ND	ND	ND
	DU145		134.884	18.4211	ND	ND
	PC3		165.116	19.7368	ND	6.27273
	H522		39.5349	10	ND	127.273
	H460		ND	23.6842	ND	82.7273
	a. Cell viabilities were detected by 72 h MTT assay and IC50 values were calculated.
	b. IC50 of RTKi in each cell line was divided by IC50 in the corresponding kinase-addicted cell line.
	Abbreviation: ND, IC50 could not be determined in the concentration range tested.
