# Supplementary material for: Receptor Tyrosine Kinase Phosphorylation Pattern–Based Multidrug Combination Is an Effective Approach for Personalized Cancer Treatment
Source: Oxford University Press journal article supplement (doi:10.1158/1535-7163.mct-15-0735), 2016-07-25
Supplement: 15357163mct150735-sup-155137_4_supp_3558886_f9ffjj.xlsx [file 15357163mct150735-sup-155137_4_supp_3558886_f9ffjj.xlsx]

## Sheet: Tab S2
Table S2. Analysis of RTK arrays in literature (cancer cell lines)
Number	Tissue origin	Sample name	Literature
1	lung	H358	International Journal of Cancer(2014),135:1002-1006
2	lung	H226	Oncogene(2008),27:3944-3956
3	lung	H1993	British Journal of Cancer(2011),105(6):807-813
4	lung	H441	British Journal of Cancer(2009),100(6):941-949
5	lung	H1666
6	lung	H292	Cancer Cell(2011),19:58-71
7	lung	H3255
8	lung	H1975
9	breast	MDA-MB-231
10	breast	SKBr3
11	breast	JIMT-1	International Journal of Oncology(2010),37:669-678
12	breast	MCF-7/LTED	Breast Cancer Research(2013),15:R55
13	breast	ZR75-1/LTED
14	breast	SUM159	Cell(2012),149:307-321
15	liver	Alex	Experimental and Therapeutic Medicine(2011),2:399-403
16	liver	HuH7
17	liver	HLE
18	liver	Li-7
19	liver	HLF
20	liver	HepG3	Journal of Hepatology(2011),55:1317-1324
21	colon	CaCO-2	International Journal of Oncology(2010),37:829-835
22	stomach	MKN45	Internaltional Journal of Oncology(2010),36:101-106
23	stomach	MKN74
24	stomach	MKN1
25	stomach	MKN7
26	stomach	KATO-III	Investigational New Drugs(2011),30(4):1352-60
27	melanoma	M229	Nature(2010),468:973-977
28	melanoma	M238
29	melanoma	LOX IMVI	Journal of Translational Medicine(2013),11:180
30	melanoma	MST-L
31	melanoma	MDA-MB-435	PLoS ONE(2013),8(11):e81579
32	melanoma	WM164	Cancer Discovery,2(3):227-235
33	melanoma	M14
34	neural system	LN382	Science(2007),318:287-290
35	neural system	SF763
36	neural system	LN18
37	neural system	HS683
38	neural system	LNZ308
39	neural system	SF767
40	neural system	LN340
41	neural system	U87MG	PNAS(2009),106(50):21306-21311
42	sarcoma	RD	Journal of Translational Medicine(2011),9:64
43	sarcoma	CW9019
44	sarcoma	Rh30
45	sarcoma	LM7	Oncogenesis(2012),1:e34
46	sarcoma	143B
47	mesothelioma	H290	Carcinogenesis(2009),30(7):1097-1105
48	mesothelioma	MSTO-211H
49	mesothelioma	Y-MESO-12
50	mesothelioma	Y-MESO-25
51	mesothelioma	Y-MESO-29
52	mesothelioma	H2373
53	mesothelioma	MESO924	Neoplasia(2011),13(1)
54	ovary/cervix	Igrov-1	Cancer Cell(2011),19:58-71
55	ovary/cervix	SKOV3	Molecular Cancer(2011),10:125
56	ovary/cervix	OVCA429
57	ovary/cervix	ES2
58	pancrease	8988S	Science(2007),318:287-290
59	pancrease	8988T
60	esophagus	KYSE30	International Journal of Oncology(2013),42:517-524
61	prostate	LnCAP	Cancer Cell(2011),19:58-71
62	head and neck	SCC1	Oncogene(2008),27:3944-3956
63	melanoma	YUDOSO	Molecular Cancer Research(2011),9(6):801-812
64	neural system	SH-SY5Y	Plos One(2013),8(9):e74547
65	ovary/cervix	2008/SCB	Cell Communication and Signaling(2014),12:59
66	head and neck	FaDu	Molecular Cancer Therapeutics(2014),13(5):1345-1355
67	head and neck	Cal27
68	head and neck	SCC-15
69	colon	LIM1215
70	head and neck	SCC-9
71	melanoma	1205Lu	Molecular Cancer Therapeutics(2014),13(12):2793-804
72	melanoma	888mel	Nature Communications(2014),5:5712
73	melanoma	518.A2
74	melanoma	SkMel28
75	melanoma	99.08
76	melanoma	02.02
77	melanoma	WM793	Oncogene(2014),33:1850-1861
78	melanoma	WM3918
79	stomach	N87	Molecular Cancer Therapeutics(2014),13(11):2527-36
80	neural system	SK-N-BE2	PLoS ONE(2014),9(4):e95628
81	neural system	IMR-32
82	sarcoma	Yamato-SS	Cancer Letters(2014),347:114-122
83	sarcoma	SYO-1
84	sarcoma	YaFu-SS
85	sarcoma	Aska-SS
86	sarcoma	Genb-SS
