# Supplementary material for: Receptor Tyrosine Kinase Phosphorylation Pattern–Based Multidrug Combination Is an Effective Approach for Personalized Cancer Treatment
Source: Oxford University Press journal article supplement (doi:10.1158/1535-7163.mct-15-0735), 2016-07-25
Supplement: 15357163mct150735-sup-155137_4_supp_3558887_q9fqjj.xlsx [file 15357163mct150735-sup-155137_4_supp_3558887_q9fqjj.xlsx]

## Sheet: Tab S3
Table S3. Analysis of RTK arrays in literature (primary patient samples)
Number	Tissue origin	Sample name	Literature
1	breast	claudin-low	Cell(2012),149:307-321
2	breast	invasive ductal carcinoma
3	liver	case 1	Experimental and Therapeutic Medicine(2011),2:399-403
4	liver	case 2
5	colon	case 1	International Journal of Oncology(2010),37:829-835
6	colon	case 2
7	colon	case 3
8	stomach	tumor	Internaltional Journal of Oncology(2010),36:101-106
9	neural system	MSK146	Science(2007),318:287-290
10	neural system	MSK199
11	neural system	MSK271
12	neural system	MSK274
13	neural system	MSK193
14	neural system	case 4	Neuro-Oncology(2010),12(8):776-789
15	neural system	case 5
16	neural system	case 12
17	neural system	case 13
18	neural system	case 18	Clinical Sarcoma Research(2010),1:4
19	neural system	case 17a
20	neural system	case 20
21	neural system	case 21
22	neural system	case n.1	Annals of Oncology(2013),24:1931-1936
23	neural system	case n.3
24	neural system	case n.6
25	neural system	case n.8
26	neural system	case n.15
27	neural system	vestibular schwannomas	Neuro-Oncology(2010),12(8):834-843
28	neural system	hemangioblastoma 1	Journal of Neuro-Oncology(2010),99(2):195-200
29	neural system	hemangioblastoma 2
30	sarcoma	case 4	Cancer Research(2010),70(18):7304-7314
31	sarcoma	case 2
32	sarcoma	case 19
33	breast	TNBC	Oncogene(2014),33:148-156
34	breast	BT1603	BMC Cancer(2014),14:302
35	breast	BT278
