# Supplementary material for: Receptor Tyrosine Kinase Phosphorylation Pattern–Based Multidrug Combination Is an Effective Approach for Personalized Cancer Treatment
Source: Oxford University Press journal article supplement (doi:10.1158/1535-7163.mct-15-0735), 2016-07-25
Supplement: 15357163mct150735-sup-155137_4_supp_3558888_59f5jk.xlsx [file 15357163mct150735-sup-155137_4_supp_3558888_59f5jk.xlsx]

## Sheet: Tab S4
	Table S4. Quantitative Summary of the Inhibition of RTK Phosphorylation*
	cell line	LAP/p-EGFR		OSI/p-InsR/IGF1R		JNJ/p-Met
		r squared	IC99 (nM)	r squared	IC99 (nM)	r squared	IC99 (nM)
	BEL7404	0.9969	525	0.9985	378	-
	SMMC7721	0.9975	547	0.9891	502	0.9755	55.4
	DU145	0.9935	551	0.9706	407	0.9350	75.2
	WiDr	0.9936	588	0.9939	598	0.9799	69.0
	* Quantitative analysis of Figure S3A-C.
