# Supplementary material for: Receptor Tyrosine Kinase Phosphorylation Pattern–Based Multidrug Combination Is an Effective Approach for Personalized Cancer Treatment
Source: Oxford University Press journal article supplement (doi:10.1158/1535-7163.mct-15-0735), 2016-07-25
Supplement: 15357163mct150735-sup-155137_4_supp_3558889_r9frjk.xlsx [file 15357163mct150735-sup-155137_4_supp_3558889_r9frjk.xlsx]

## Sheet: Tab S5
	Table S5. Drug Effects on the Viabilities of SMMC7721 Cells
	Cell line	in vitro RTK activation	LAP (E)	OSI (I)	JNJ (M)	CRI (M)	LAP+OSI (E+I)	LAP+CRI (E+M)	LAP+OSI+JNJ (E+I+M)	LAP+OSI+CRI (E+I+M)
	SMMC7721	E+I+M	15	8.7	ND	8.9	4.9	7.2	1.0	1.9
	Notes: 1) Cell viabilities were detected by 72 h MTT assay. Drug ratios were as follows: LAP:OSI:JNJ:CRI=10:10:1:1. Drug effects were illustrated by IC50 ratios.
	2) To determine IC50 ratios, the IC50 value of LAP+OSI+JNJ, the most sensitive treatment (MST), was used as a common denominator. The IC50 ratio for each combination was derived by dividing the IC50 value for LAP by the MST IC50 for LAP. The IC50 ratios for single drugs were derived by dividing the IC50 value for that single drug by the MST IC50 value for that drug (if present in the MST) or for …
	3) Abbreviations: E, EGFR family; I, IR family; M, MET family; LAP, lapatinib; OSI, osi-906; JNJ, jnj38877605; CRI, crizotinib; ND, IC50 could not be determined in the concentration range tested.
